# Supplementary material
Source: HighWire-hosted journal article supplement (https://erj.ersjournals.com/content/57/6/2100115)
Supplement: inline-supplementary-material-1 [file inline-supplementary-material-1.pdf]

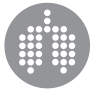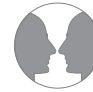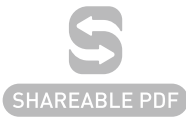

# The role of cardiopulmonary exercise test in identifying pulmonary veno-occlusive disease

Carmen Pérez-Olivares<sup>1,2,3,4</sup>, Teresa Segura de la Cal<sup>1,2,3,4</sup>, Ángela Flox-Camacho<sup>1,2,3,4</sup>, Jorge Nuche<sup>1,2,3,4,5</sup>, Jair Tenorio<sup>3,6</sup>, Amaya Martínez Meñaca<sup>7</sup>, Alejandro Cruz-Utrilla<sup>1,2,3,4</sup>, Javier de la Cruz-Bertolo<sup>4</sup>, Marte Pérez Núñez<sup>3,8</sup>, Spanish PAH Consortium<sup>1,6</sup>, Fernando Arribas-Ynsaurriaga <sup>1,2,3,4</sup> and Pilar Escribano Subías<sup>1,2,3,4</sup>

**Affiliations:** <sup>1</sup>Dept of Cardiology, Hospital Universitario 12 de Octubre, Madrid, España. <sup>2</sup>Ciber-CV, Centro de investigación Biomédica en Red de Enfermedades Cardiovasculares, Madrid, Spain. <sup>3</sup>Centro de Referencia Nacional de Hipertensión Pulmonar Compleja and ERN-Lung-Pulmonary Hypertension Referral Center, Madrid, Spain. <sup>4</sup>Instituto de Investigación Sanitaria del Hospital Universitario 12 de Octubre (Imas12), Red SAMID, Madrid, Spain. <sup>5</sup>Centro Nacional de Investigación Cardiovascular Carlos III (CNIC), Madrid, Spain. <sup>6</sup>INGEMM, Instituto de Genética Médica y Molecular, IdiPAZ, Hospital Universitario La Paz, Madrid, Spain. <sup>7</sup>Dept of Pneumology, Hospital Universitario Marqués de Valdecilla, Cantabria, Spain. <sup>8</sup>Dept of Radiology, Hospital Universitario 12 de Octubre, Madrid, Spain.

**Correspondence:** Pilar Escribano Subías, Dept of Cardiology, Hospital Universitario 12 de Octubre, avda de Andalucía SN, Madrid, 28041, Spain. E-mail: pilar.escribano.subias@gmail.com

 @ERSpublications

**Cardiopulmonary exercise tests provide additional data for the noninvasive diagnosis of pulmonary veno-occlusive disease** <https://bit.ly/3p6Dzc5>

**Cite this article as:** Pérez-Olivares C, Segura de la Cal T, Flox-Camacho Á, *et al.* The role of cardiopulmonary exercise test in identifying pulmonary veno-occlusive disease. *Eur Respir J* 2021; 57: 2100115 [<https://doi.org/10.1183/13993003.00115-2021>].

This single-page version can be shared freely online.

*To the Editor:*

Pulmonary veno-occlusive disease (PVOD) is a rare form of pulmonary hypertension that shares some clinical and haemodynamic features with idiopathic pulmonary arterial hypertension (PAH). However, suspicion of PVOD is crucial, considering that PAH-specific treatment may precipitate life-threatening pulmonary oedema and lung transplant should be considered from diagnosis [1, 2].
